# Supplementary material
Source: MDPI journal article supplement (https://www.mdpi.com/2571-9408/7/5/105)
Supplement: s1 [file s1]

**Table S1** – Santarém Stereomicroscope fabric sherd characterization

| Sample | Colour 1 | Colour 2 | Pores | Pore Orientation | Temper | Distribution | Size  | Quartz Colour | Sherd Thickness (mm) | Notes                                    |
|--------|----------|----------|-------|------------------|--------|--------------|-------|---------------|----------------------|------------------------------------------|
| S1     | Brick    | Yellow   | V     | N                | H      | UM           | F     | Gray          | 5                    |                                          |
| S2     | Light    | Rose     | NV    |                  | L      | UM           | F     | Gray          | 3                    |                                          |
| S3     | Light    |          | V     | Y                | L-M    | UM           | F     | Gray          | 4                    |                                          |
| S4     | Light    |          | V     | Y                | L-M    | UM           | F     | Gray          | 5                    |                                          |
| S5     | Light    |          | V     | N                | M      | UM           | I     | Rose/Red      | 4                    |                                          |
| S6     | Light    |          | V     | Y                | L-M    | BM           | F-C   | Rose          | 2-3.5                |                                          |
| S7     | Light    |          | V     | Y                | M      | UM           | F     | Mixed         | 4                    |                                          |
| S8     | Light    |          | V     | Y                | L-M    | UM           | F     | Gray          | 6                    | Large Quartz Particles                   |
| S9     | Light    | Cream    | NV    |                  | M      | UM           | F     | Mixed         | 3                    | Large Quartz Particles;<br>Red Particles |
| S10    | Light    |          | V     | Y                | L      | UM           | F     | Gray          | 5                    | Large Quartz Particles                   |
| S11    | Light    |          | V     | Y                | L      | UM           | F     | Gray          | 2-2.5                |                                          |
| S12    | Light    |          | V     | Y                | L      | UM           | F     | Mixed         | 3                    | Red Particles                            |
| S13    | Light    |          | V     | Y                | L      | UM           | F     | Gray          | 4                    |                                          |
| S14    | Light    | Rose     | V     | Y                | M      | UM           | I     | Gray          | 8                    | Large Quartz Particles                   |
| S15    | Light    |          | V     | Y                | M      | A            | F-I-C | Gray          | 2                    |                                          |
| S16    | Light    |          | V     | Y                | M      | BM           | F-C   | Mixed         | 4                    | Lithic Feldspar                          |
| S17    | Light    |          | NV    |                  | L      | UM           | F     | Mixed         | 4                    | Red Particles                            |
| S18    | Light    |          | NV    |                  | H      | A            | F-I-C | Mixed         | 10                   |                                          |
| S19    | Light    |          | V     | Y                | M      | BM           | F-C   | Mixed         | 14X28                |                                          |
| S20    | Light    |          | V     | Y                | L      | UM           | F     | Gray          | 4                    |                                          |

V - Visible    Y - Yes    L - Low    UM -Unimodal    F - Fine    Gray -  
 NV - Not    N - No    M - Medium    BM - Bimodal    I - Intermediate    Gray/Colourless  
              Visible                                H - High    A- All classes    C - Coarse

**Table S2** – European Stereomicroscope fabric sherd characterization

| Sample | Colour 1   | Colour 2 | Pores | Pore Orientation | Temper | Distribution | Size  | Quartz Colour | Sherd Thickness (mm) | Notes                         |
|--------|------------|----------|-------|------------------|--------|--------------|-------|---------------|----------------------|-------------------------------|
| A1     | Light      |          | V     | Y                | L      | UM           | F     | Mixed         | 3                    |                               |
| A2     | Light      |          | V     | Y                | L      | UM           | F     | Mixed         | 4-5                  |                               |
| B1     | Brick      |          | V     | N                | H      | UM           | I     | Gray          | 5                    |                               |
| B2     | Brick      |          | V     | Y                | H      | UM           | I     | Gray          | 5                    |                               |
| B3     | Brick      |          | V     | N                | H      | UM           | I     | Gray          | 4-5                  |                               |
| K1     | Light      | White    | NV    |                  | H      | BM           | F-I   | Rose          | 5-5.5                | Black Particles               |
| K2     | Light      | Rose     | NV    |                  | H      | UM           | I     | Mixed         | 3.5-4                |                               |
| K3     | Light      |          | V     | Y                | H      | A            | F-I-C | Orange        | 5                    |                               |
| K4     | Light      |          | V     | N                | H      | UM           | I     | Mixed         | 4                    |                               |
| Z1     | Dark Brown |          | V     | Y                | H      | BM           | F-I   | Gray          | 4                    |                               |
| Z2     | Dark Brown |          | V     | Y                | H      | UM           | I     | Gray          | 5                    |                               |
| SH1    | Light      | Cream    | NV    |                  | H      | A            | F-I-C | Mixed         | 3.5-4                |                               |
| SH2    | Light      |          | NV    |                  | M      | UM           | F     | Gray          | 5                    | Mica Orientation              |
| SH3    | Light      | Cream    | V     | Y                | H      | BM           | F-C   | Mixed         | 6-9                  |                               |
| SH4    | Light      | Cream    | NV    |                  | I      | UM           | I     | Gray          | 11                   | Large Pores; Redish Particles |
| ST1    | Light      |          | NV    |                  | L-M    | UM           | F     | Mixed         | 4                    |                               |
| ST2    | Light      |          | NV    |                  | L-M    | UM           | F     | Mixed         | 3.5-4                | Large Quartz Particles        |
| ST3    | Light      |          | NV    |                  | L-M    | UM           | I     | Mixed         | 4                    |                               |
| ST4    | Light      |          | NV    |                  | L-M    | UM           | F     | Mixed         | 2                    | Mica                          |
| C1     | Light      | Cream    | NV    |                  | I      | BM           | F-I   | Gray          | 4                    |                               |

V - Visible

Y - Yes

L - Low

UM -Unimodal

F - Fine

Gray -  
Gray/Colourless

NV - Not  
Visible

N - No

M - Medium

BM - Bimodal

I - Intermediate

H - High

A- All classes

C - Coarse
